# Supplementary material for: Harnessing the power of natural deep eutectic solvents (choline chloride/sucrose) and polypropylene glycol in the formation of aqueous biphasic systems and the application of these systems in drug extraction
Source: Royal Society of Chemistry journal article supplement (doi:10.1039/d3ra07066b), 2024-01-01
Supplement: d3ra07066b1.pdf [file d3ra07066b1.pdf]

**Harnessing the power of natural deep eutectic solvents (choline chloride/sucrose) and polypropylene glycol in the formation of aqueous biphasic systems and the application of these systems in drug extraction**

**Fariba Ghaffari, Mohammed Taghi Zafarani-Moattar,\* Hemayat Shekaari**

*Department of Physical Chemistry, University of Tabriz, Tabriz, Iran*

---

\*Corresponding author. Tel: +98 4133393135 Fax: 98 4133340191.  
E-mail addresses: zafarani47@yahoo.com.

**Table S1**

The values of parameters of Eq. 10, Eq. 11 and 12 along with the standard deviation of the models,  $sd$ , from the experimental values of partition coefficients for the {PPG400 + ChCl(HBA) +sucrose(HBD) + H<sub>2</sub>O} at 298.15 K and atmospheric pressure ( $\approx$  85 kPa).

| HBA:HBD | Diamond-Hsu (Eq. 10)          |                |                  |                  |
|---------|-------------------------------|----------------|------------------|------------------|
|         | $A$                           | $10^3 \cdot B$ |                  | $100 \cdot sd^a$ |
|         | Diclofenac potasium           |                |                  |                  |
| 2:1     | 0.0907                        | -0.8209        |                  | 0.49             |
| 1:1     | 0.0917                        | -0.9239        |                  | 0.38             |
|         | Salicylic acid                |                |                  |                  |
| 2:1     | 0.092                         | -0.8639        |                  | 0.30             |
| 1:1     | 0.0899                        | -0.8975        |                  | 0.30             |
|         | Acetaminophen                 |                |                  |                  |
| 2:1     | 0.1415                        | -1.7571        |                  | 0.59             |
| 1:1     | 0.1669                        | -2.4408        |                  | 0.17             |
|         | Modified Diamond-Hsu (Eq. 11) |                |                  |                  |
|         | $A_1$                         | $B_1$          | $10^4 \cdot C_1$ | $100 \cdot sd$   |
|         | Diclofenac potasium           |                |                  |                  |
| 2:1     | 4.4090                        | -0.0385        | 1.1532           | 0.11             |
| 1:1     | 3.8590                        | -0.0325        | 63.1330          | 0.12             |
|         | Salicylic acid                |                |                  |                  |
| 2:1     | 3.3914                        | -0.0075        | -1.4389          | 0.02             |
| 1:1     | 2.9721                        | -0.0058        | -1.373           | 0.13             |
|         | Acetaminophen                 |                |                  |                  |
| 2:1     | -4.9348                       | 0.2861         | -0.0028          | 0.41             |
| 1:1     | 2.6239                        | 0.0824         | -18.0000         | 0.40             |
|         | Polynomial Equation (Eq. 12)  |                |                  |                  |

|                      | $A_2$   | $B_2$   | $10^4 \cdot C_2$ | $100 \cdot sd$ |
|----------------------|---------|---------|------------------|----------------|
| Diclofenac potassium |         |         |                  |                |
| 2:1                  | 5.3917  | -0.2759 | 55.6320          | 0.14           |
| 1:1                  | 5.5045  | -0.3118 | 64.3750          | 0.08           |
| Salicylic acid       |         |         |                  |                |
| 2:1                  | 4.6506  | -0.1868 | 25.2990          | 0.16           |
| 1:1                  | 4.6038  | -0.2137 | 37.8300          | 0.10           |
| Acetaminophen        |         |         |                  |                |
| 2:1                  | 2.9866  | 0.1712  | -0.0153          | 0.45           |
| 1:1                  | 12.1332 | -0.8287 | 95.8130          | 0.22           |

$sd = \left( \sum_{i=1}^N (K^{cal} - K^{exp})^2 / N \right)^{0.5}$  where  $K$  and  $N$  represented the partition coefficients and number of partition coefficient data, respectively.

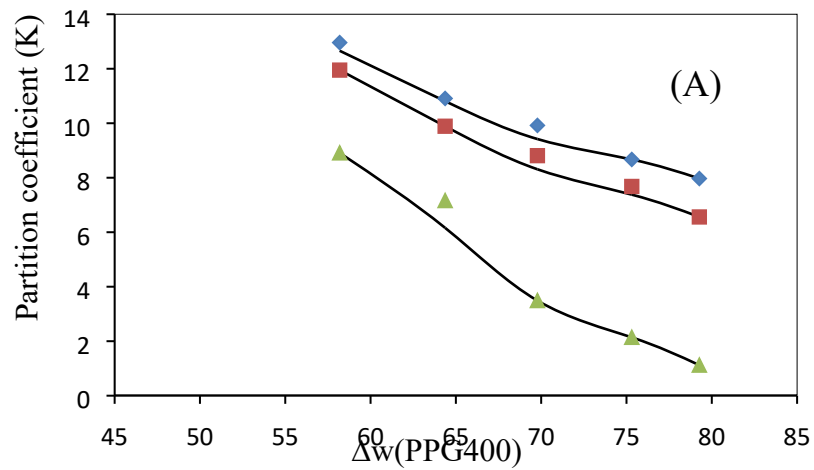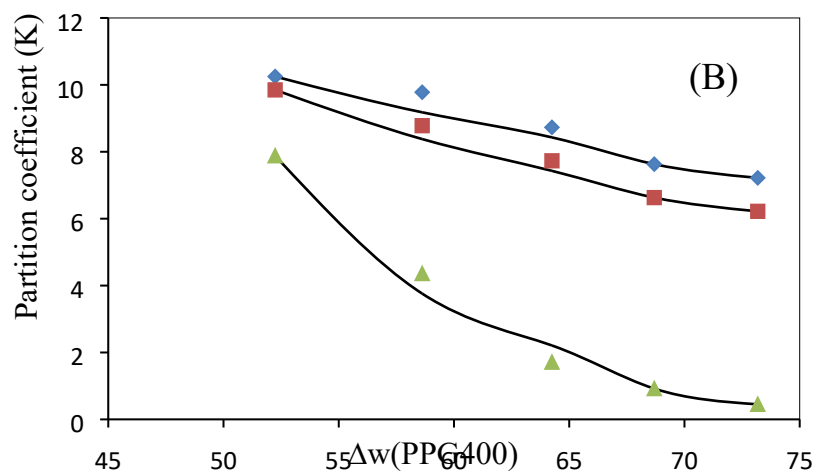

**Fig. S1.** Partition coefficient,  $K$ , as a function of the mass fraction difference of PPG400 in the top and bottom phases for each studied drug in ABS {NADES [ChCl : sucrose] + PPG400 + H<sub>2</sub>O} at different ChCl:sucrose molar ratios: (A) 2:1; (B) 1:1. Diclofenac potassium: (◆); Salicylic acid: (■); Acetaminophen: (▲); (-); calculated partition coefficient,  $K$ , from Eq. 10.

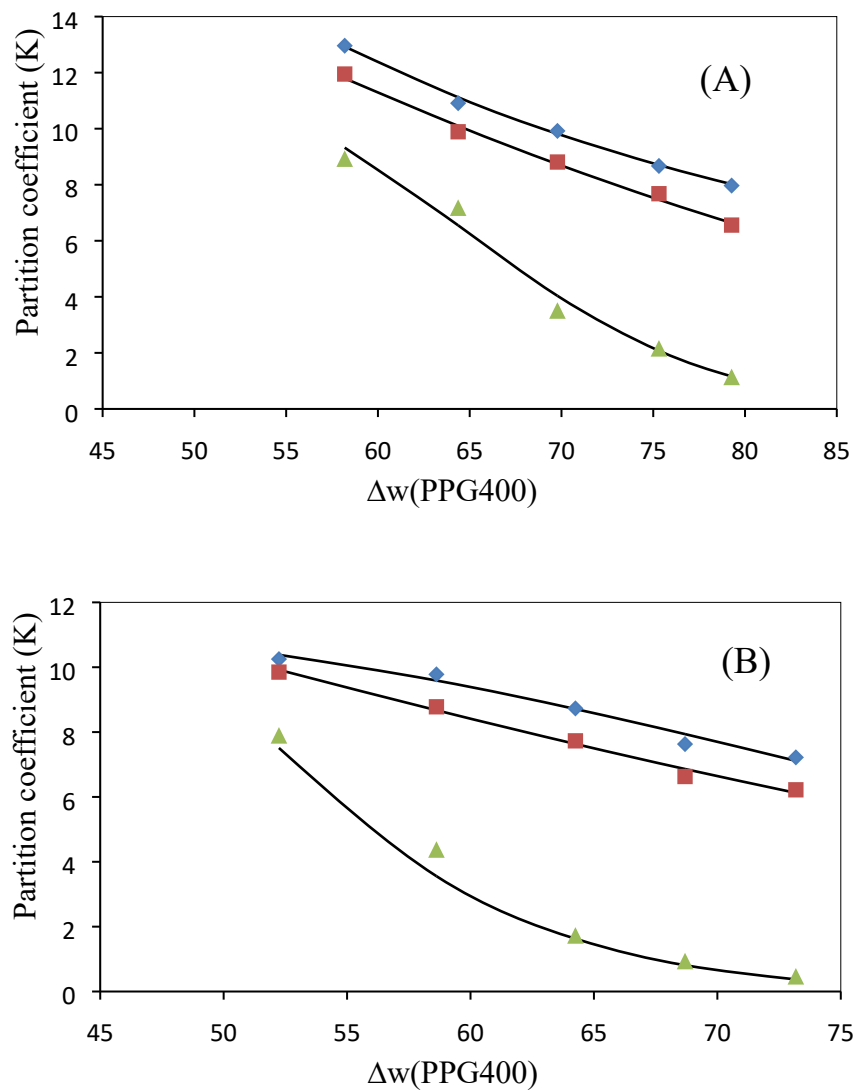

**Fig. S2.** Partition coefficient,  $K$ , as a function of the mass fraction difference of PPG400 in the top and bottom phases for each studied drug in ABS {NADES [ChCl : sucrose] + PPG400 + H<sub>2</sub>O} at different ChCl:sucrose molar ratios: (A) 2:1; (B) 1:1. Diclofenac potassium: (◆); Salicylic acid: (■); Acetaminophen: (▲); (-); calculated partition coefficient,  $K$ , from Eq. 11.

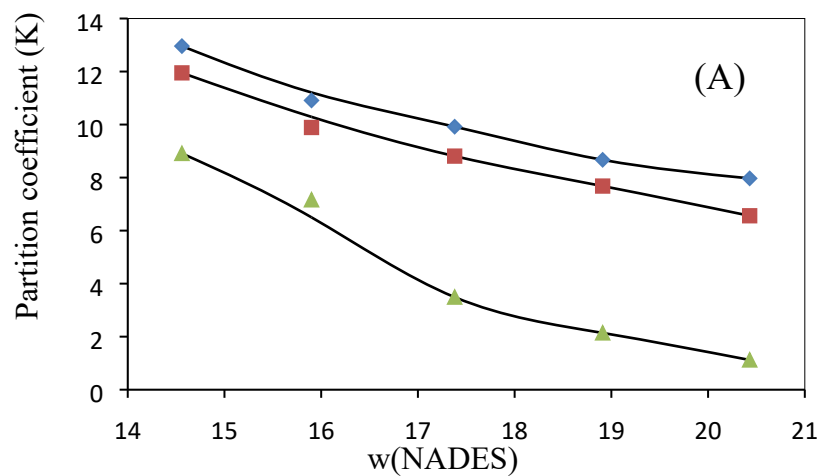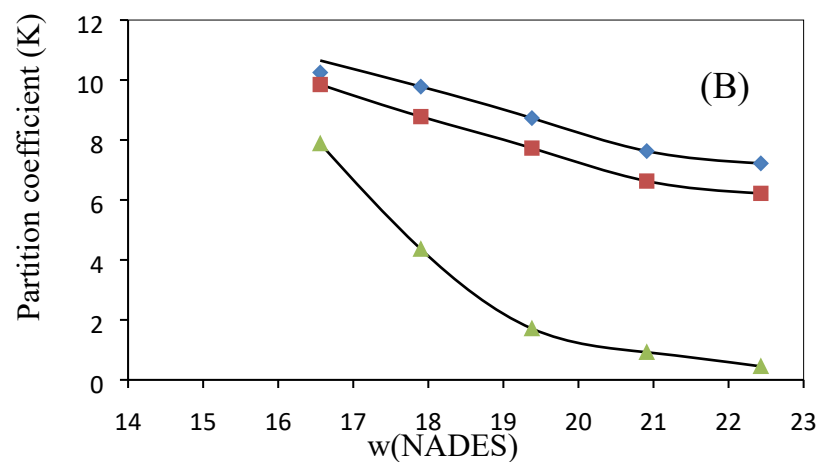

**Fig. S3.** Partition coefficient,  $K$ , as a function of the overall composition of NADES for each studied drug in ABS {NADES [ChCl : sucrose] + PPG400 + H<sub>2</sub>O} at different ChCl: sucrose molar ratios: (A) 2:1; (B) 1:1. Diclofenac potassium: (◆); Salicylic acid: (■); Acetaminophen: (▲); (-); calculated partition coefficient,  $K$ , from Eq. 12.
